# Supplementary material for: A human tissue map of 5-hydroxymethylcytosines exhibits tissue specificity through gene and enhancer modulation
Source: PubMed Central journal article supplement (PMC7710742; doi:10.1038/s41467-020-20001-w), 2020-12-02
Supplement: 41467_2020_20001_MOESM1_ESM.pdf [file 41467_2020_20001_MOESM1_ESM.pdf]

## Supplementary Information

### **A human tissue map of 5-hydroxymethylcytosine exhibits tissue specificity through gene and enhancer modulation**

Xiao-Long Cui<sup>1,2,7</sup>, Ji Nie<sup>1,2,7</sup>, Jeremy Ku<sup>3,7</sup>, Urszula Dougherty<sup>4</sup>, Diana C. West-Szymanski<sup>2,4</sup>, Francois Collin<sup>3</sup>, Christopher K. Ellison<sup>3</sup>, Laura Sieh<sup>1,2</sup>, Yuhong Ning<sup>3</sup>, Zifeng Deng<sup>4</sup>, Carolyn W.T. Zhao<sup>1,2</sup>, Anna Bergamaschi<sup>3</sup>, Joel Pekow<sup>4</sup>, Jiangbo Wei<sup>1,2</sup>, Alana V. Beadell<sup>1,2</sup>, Zhou Zhang<sup>5</sup>, Geeta Sharma<sup>6</sup>, Raman Talwar<sup>3</sup>, Patrick Arensdorf<sup>3</sup>, Jason Karpus<sup>1,2</sup>, Ajay Goel<sup>6</sup>, Marc Bissonnette<sup>4</sup>, Wei Zhang<sup>5</sup>, Samuel Levy<sup>3</sup>, Chuan He<sup>1,2,\*</sup>

<sup>1</sup>Department of Chemistry, Department of Biochemistry and Molecular Biology, Institute for Biophysical Dynamics, University of Chicago, Chicago, IL, USA

<sup>2</sup>Howard Hughes Medical Institute, University of Chicago, Chicago, IL, USA

<sup>3</sup>Bluestar Genomics Inc., San Diego, CA, USA

<sup>4</sup>Department of Medicine, University of Chicago, Chicago, IL, USA

<sup>5</sup>Department of Preventive Medicine, Northwestern University Feinberg School of Medicine, Chicago, IL, USA

<sup>6</sup>City of Hope Comprehensive Cancer Center, Duarte, CA, USA

<sup>7</sup>These authors contributed equally to this work

\*Correspondence: [chuanhe@uchicago.edu](mailto:chuanhe@uchicago.edu) (C.H.)

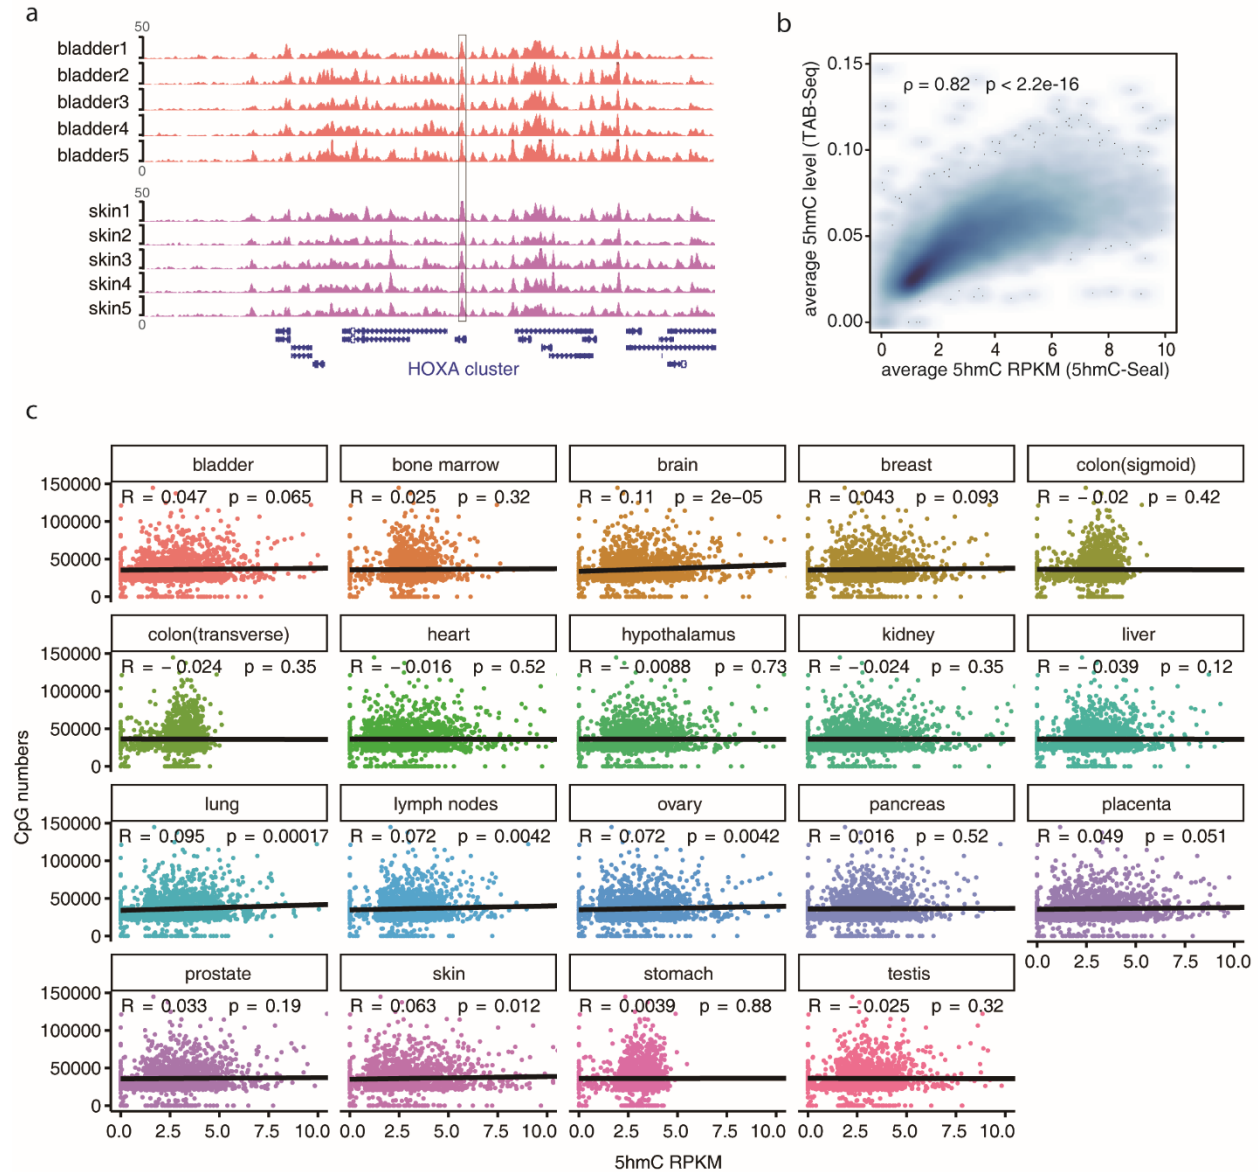

**Supplementary Figure 1. Quality control of 5hmC-Seal profiles.** **a**, Genome browser view of 5hmC genomic distributions at the HOXA gene cluster for each donor of bladder tissue (n = 5) and skin tissue (n = 5). **b**, Density plot showing correlations of 5hmC-Seal data with TAB-Seq data across 2-Mb genomic bins in prostate.  $\rho$  represents the Spearman correlation coefficient. **c**, Scatter plots of 5hmC RPKM against CpG numbers across 2-Mb genomic bins in different tissues.  $R$  represents the Pearson correlation coefficient.

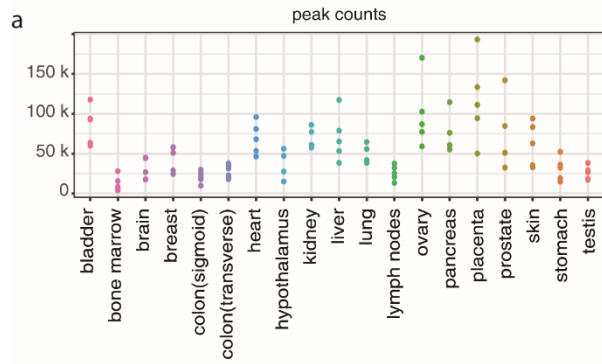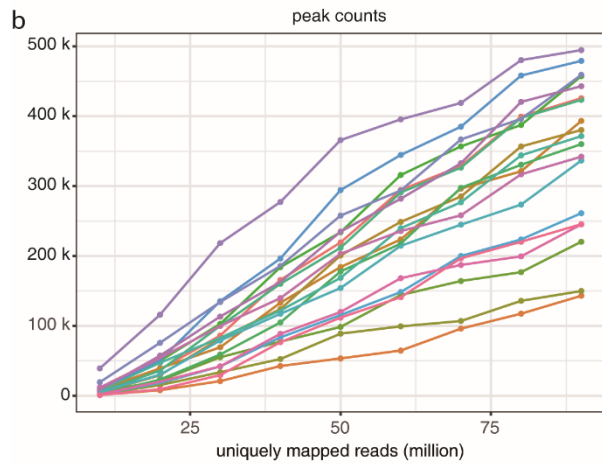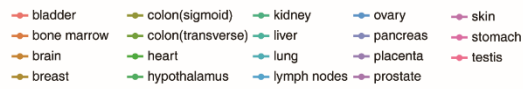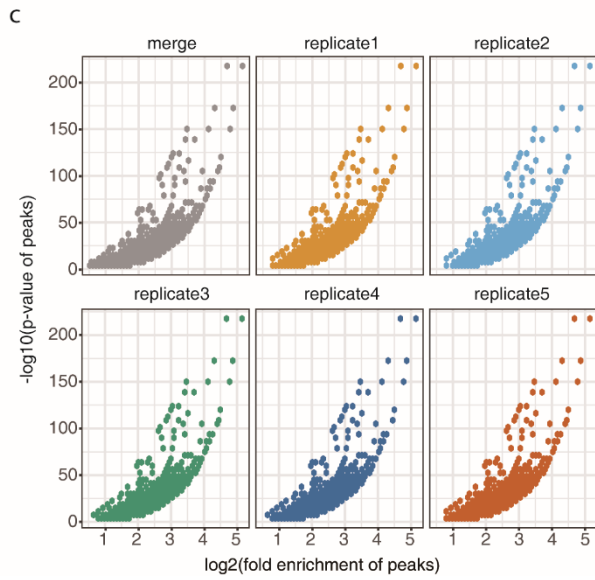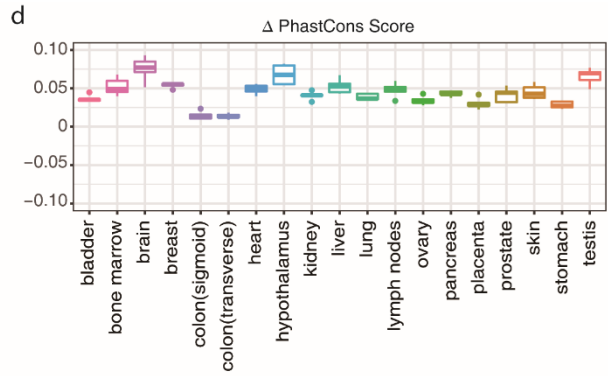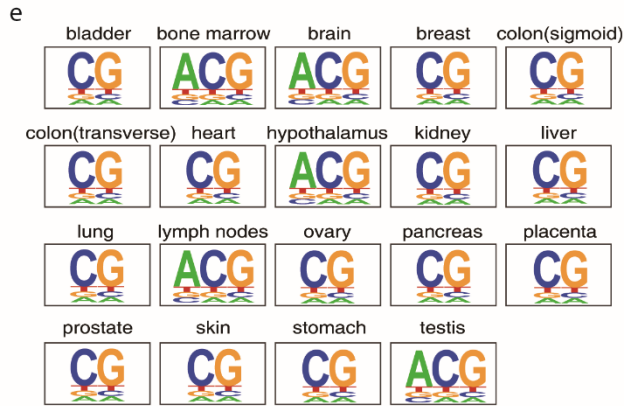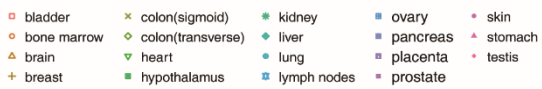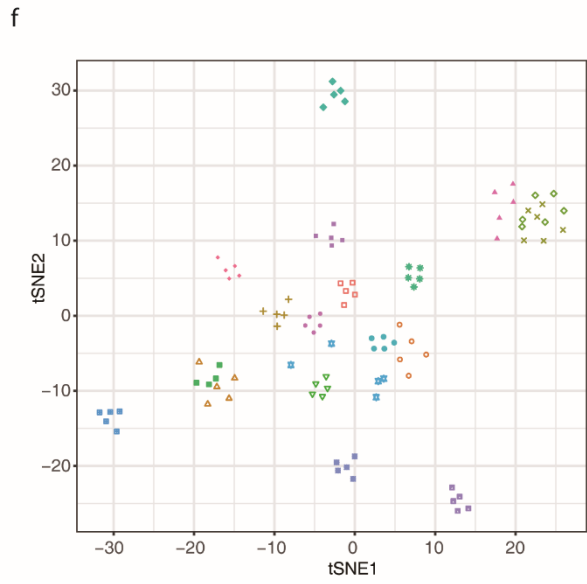

**Supplementary Figure 2. Characteristics of 5hmC peaks.** **a**, Numbers of 5hmC peaks across different tissues. Individual dots on the lines indicate different donor samples. **b**, Saturation curves showing 5hmC peak numbers against uniquely mapped reads for different tissues. **c**, Distributions of p-values and fold enrichments of 5hmC peaks in independent and merged prostate samples. **d**, Conservation status of 5hmC peaks minus control peaks based on PhastCons score. N= 5 biologically independent samples were used (n=4 for hypothalamus and n=6 for sigmoid and transverse colon). For all boxplots, center line represents median, bounds of box represent 25th and 75th percentiles and whiskers are Tukey whiskers. **e**, Top significant motifs under 5hmC peaks across different tissues. **f**, t-SNE clustering of genomic 5hmC distributions on 5hmC peaks for all donor tissue samples. Colored symbols indicate the organ/tissue associated with each 5hmC profile.

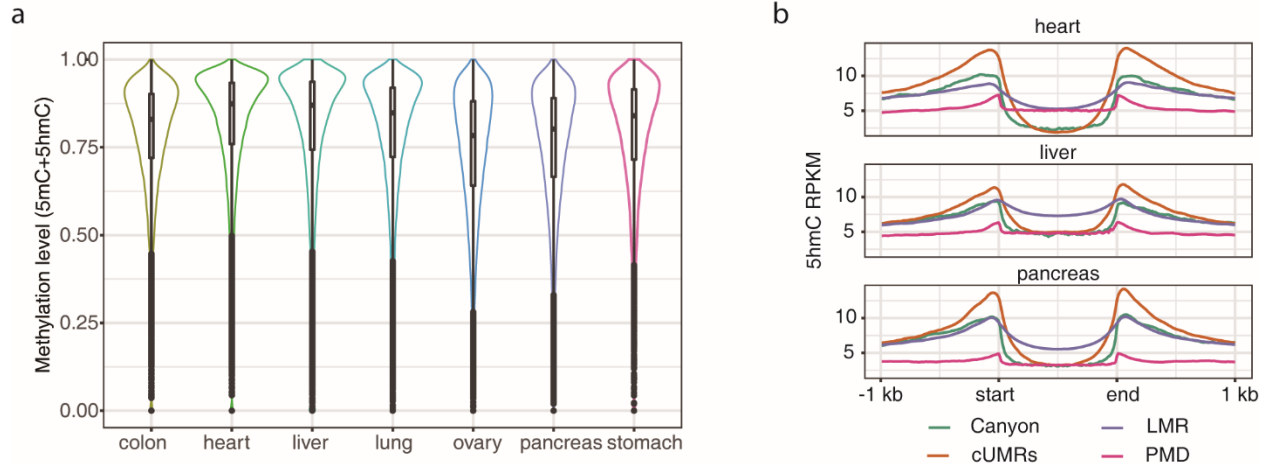

**Supplementary Figure 3. Distribution patterns of 5hmC and 5mC.** **a**, Methylation level (5mC + 5hmC) distributions across 5hmC peaks in 8 representative tissue types. N = 22,511 high-quality 5hmC peaks were used for colon, n = 35,828 for heart, n = 51,959 for liver, n = 30,063 for lung, n = 77,029 for ovary, n = 57,519 for pancreas, and n = 21,755 for stomach. For all boxplots, center line represents median, bounds of box represent 25th and 75th percentiles and whiskers are Tukey whiskers. **b**, 5hmC signals across different categories of the genome based on bisulfite sequencing. Canyons: DNA methylation canyons; cUMRs: control unmethylated regions; PMD: partially methylated domains; LMR: lowly methylated regions.

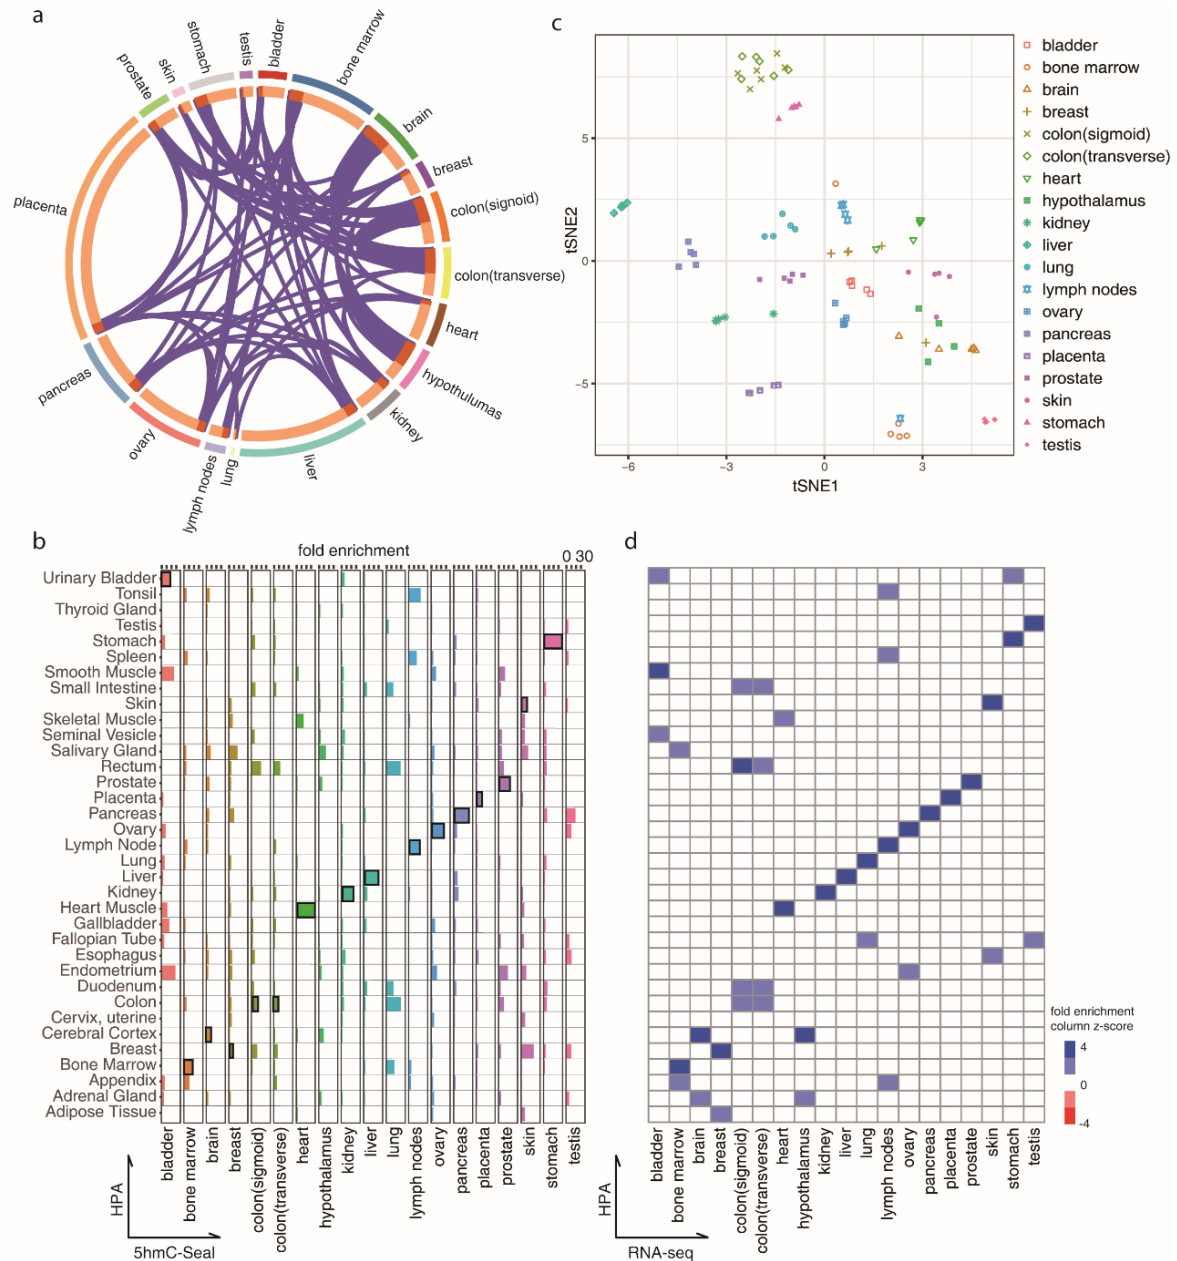

**Supplementary Figure 4. Tissue-specific genes identified by 5hmC profiles and RNA-Seq.**

**a**, Shared membership amongst different tissue-specific 5hmC modified genes. **b**, Fold enrichment of tissue-specific, 5hmC-modified genes with tissue-specific expressed genes from Human Protein Atlas. Bars with black boxes are concordant tissue types from Human Protein Atlas. **c**, t-SNE clustering of expression profiles on gene bodies for all donor tissue samples.

Colored symbols indicate the organ/tissue associated with each expression profile. **d**, Enrichment of our tissue-specific expressed genes via RNA-seq with those defined by Human Protein Atlas project.

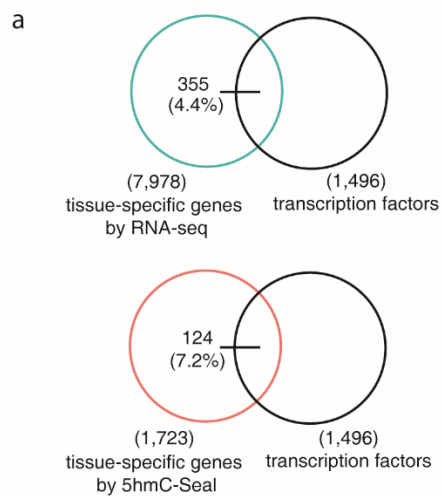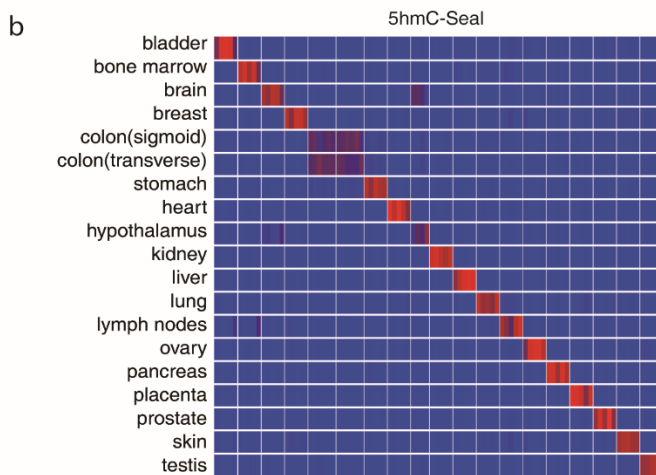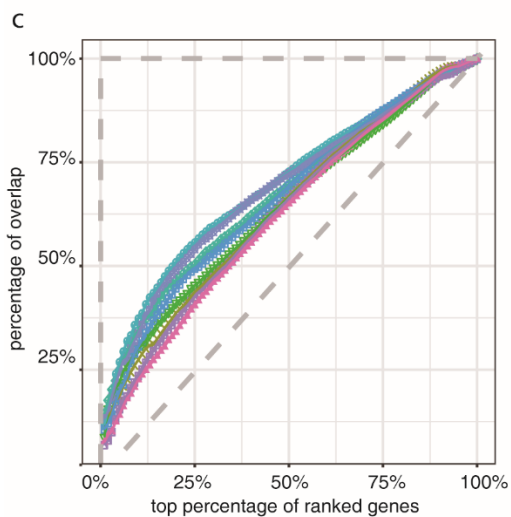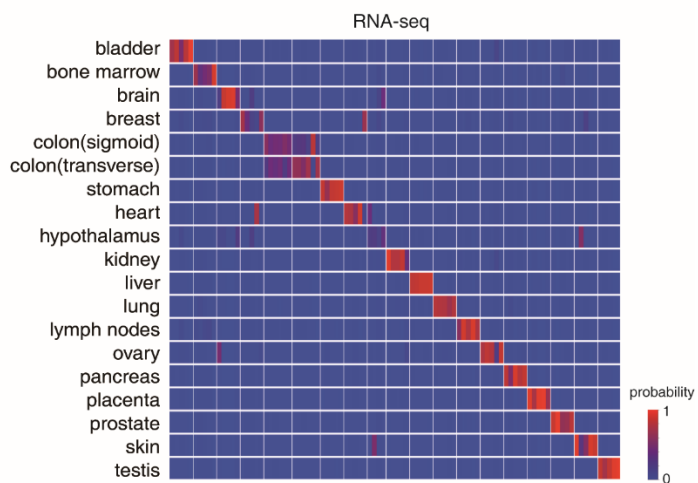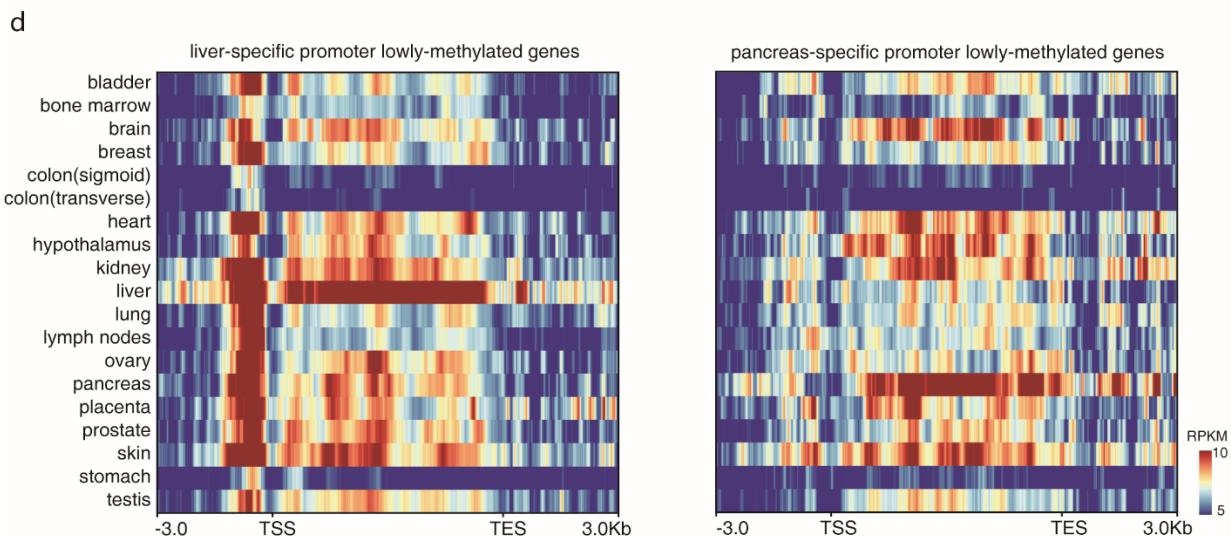



**Supplementary Figure 5. Enrichment of 5hmC on tissue-specific genes.** **a**, Overlaps between transcription factor genes and tissue-specific genes defined by 5hmC-Seal or RNA-seq. **b**, Multiclass regression models generated from 5hmC profiles and RNA-seq expression profiles for each of the 19 tissue types. The heatmap shown indicates different probability of model prediction. **c**, Correspondence at the top (CAT) plot showing percentages of gene overlap against top percentages of 5hmC-modified genes and H3K36me3-modified genes. **d**, Heatmaps showing tissue-specific, promoter lowly-methylated genes possessing the highest 5hmC signals in liver and pancreas tissues. Colors indicates RPKM values. TSS, transcription start site. TES, transcription end site.

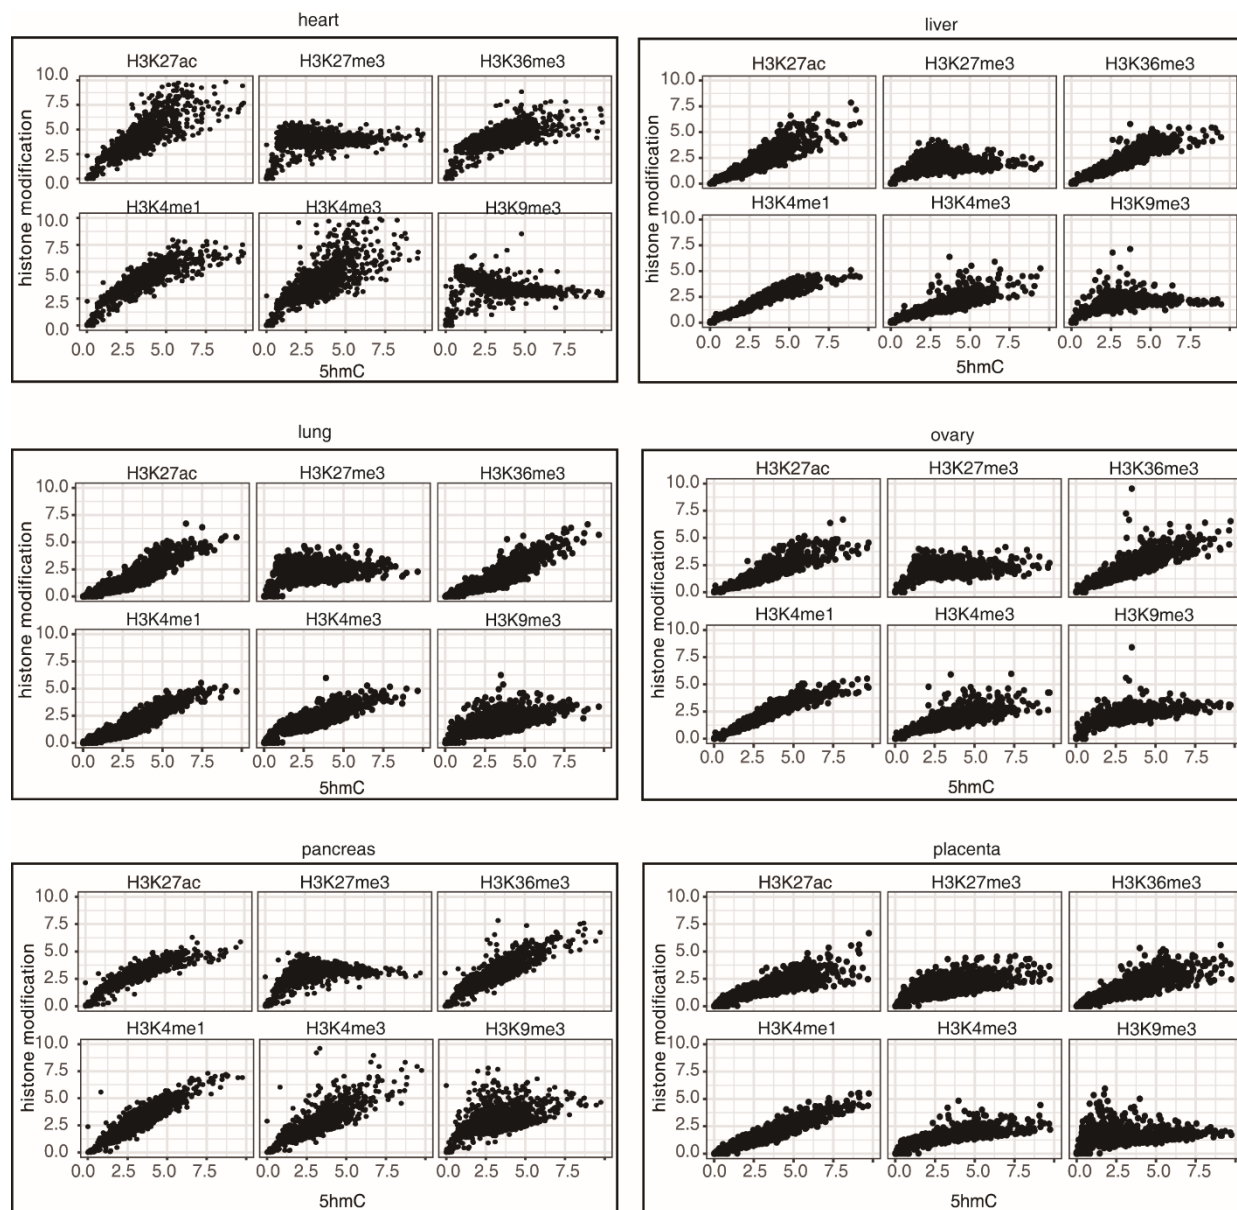

**Supplementary Figure 6. Correlations of 5hmC profiles with other epigenomic data.** Scatter plots for 2-Mb bins across the genome are shown.
