# Supplementary material for: A human tissue map of 5-hydroxymethylcytosines exhibits tissue specificity through gene and enhancer modulation
Source: PubMed Central journal article supplement (PMC7710742; doi:10.1038/s41467-020-20001-w), 2020-12-02
Supplement: 41467_2020_20001_MOESM5_ESM.pdf [file 41467_2020_20001_MOESM5_ESM.pdf]

### **Description of Additional Supplementary Files**

Supplementary Data 1

Patient and 5hmC-Seal quality control information for all 96 samples.

Supplementary Data 2

Functional enrichment of tissue-specific 5hmCmodified genes.

Supplementary Data 3

Transcription factor genes covered by tissue-specific 5hmC-modified genes or tissue-specific expressed genes.
